# Supplementary material for: Exploring the Microbiome Analysis and Visualization Landscape
Source: PubMed Central journal article supplement (PMC9580862; doi:10.3389/fbinf.2021.774631), 2021-12-02
Supplement: DataSheet1.pdf [file DataSheet1.pdf]

## Supplementary Material

### 1 SUPPLEMENTARY TABLES AND FIGURES

#### 1.1 Tables

|                                                                                                                                                                                                                                                                                                                                                                                                                                                                                                                                                                                                                                                                                                                                                                                                                                                                                                                                                                                                                                                                                                                                                                                                                                                                                                                                                                                                                                                                                                                                                                                                                                                                                                                                    |
|------------------------------------------------------------------------------------------------------------------------------------------------------------------------------------------------------------------------------------------------------------------------------------------------------------------------------------------------------------------------------------------------------------------------------------------------------------------------------------------------------------------------------------------------------------------------------------------------------------------------------------------------------------------------------------------------------------------------------------------------------------------------------------------------------------------------------------------------------------------------------------------------------------------------------------------------------------------------------------------------------------------------------------------------------------------------------------------------------------------------------------------------------------------------------------------------------------------------------------------------------------------------------------------------------------------------------------------------------------------------------------------------------------------------------------------------------------------------------------------------------------------------------------------------------------------------------------------------------------------------------------------------------------------------------------------------------------------------------------|
| <p>Q1: Conceptually, what information/knowledge can we gain or would we like to obtain from doing microbiome research?</p> <ul style="list-style-type: none"> <li>* Influence of food on obesity</li> <li>* How drugs change the gut microbiome</li> <li>* Effect of past diseases (how gut microbiome changes after having had certain disease e.g. salmonella)</li> <li>* Effects on plant growth/production</li> <li>* Role in diseases</li> <li>* Define and find differences in different health and disease statuses.</li> <li>* Effect on health</li> <li>* Influence of food and other factors on microbiome</li> <li>* Microbiome effects on plants (yield more, more productive agriculture)</li> <li>* Impact of bacteria metabolites on treatment efficiency</li> <li>* Role of gut microbiome in autoimmunity (e.g. how microbiome can influence t-cells)</li> <li>* Effect on immune response</li> <li>* Precision medicine</li> <li>* Influence on psychology (mood, depression, ...)</li> <li>* Who has a dog? (based on skin microbiome)</li> <li>* Changes during day or different seasons</li> <li>* Who lives with whom? (instead of dna, use microbiome to see who was in contact with whom)</li> <li>* Composition of microbiome with varying diet</li> <li>* Microbiome and survival</li> <li>* Composition of microbiome with respect to body combacting diseases</li> <li>* How "quickly" does diet have effect on microbiome?</li> <li>* Link between diet and longevity?</li> <li>* Use of fecal therapy</li> <li>* Relation between microbiome and MS</li> <li>* How do drugs change the microbiome, and at the same time affect other clinical variables</li> <li>* Diversity and richness</li> </ul> |
|------------------------------------------------------------------------------------------------------------------------------------------------------------------------------------------------------------------------------------------------------------------------------------------------------------------------------------------------------------------------------------------------------------------------------------------------------------------------------------------------------------------------------------------------------------------------------------------------------------------------------------------------------------------------------------------------------------------------------------------------------------------------------------------------------------------------------------------------------------------------------------------------------------------------------------------------------------------------------------------------------------------------------------------------------------------------------------------------------------------------------------------------------------------------------------------------------------------------------------------------------------------------------------------------------------------------------------------------------------------------------------------------------------------------------------------------------------------------------------------------------------------------------------------------------------------------------------------------------------------------------------------------------------------------------------------------------------------------------------|

**Table S1.** Answers provided by the workshop participants to question 1.

|                                                                                                                                                                                                                                                                                                                                                                                                                                                                                                                                                                                                                                                                                                                                                                                                                                                                                                                                                                                                                                                                                                                                                                                                                            |
|----------------------------------------------------------------------------------------------------------------------------------------------------------------------------------------------------------------------------------------------------------------------------------------------------------------------------------------------------------------------------------------------------------------------------------------------------------------------------------------------------------------------------------------------------------------------------------------------------------------------------------------------------------------------------------------------------------------------------------------------------------------------------------------------------------------------------------------------------------------------------------------------------------------------------------------------------------------------------------------------------------------------------------------------------------------------------------------------------------------------------------------------------------------------------------------------------------------------------|
| <p>Q2: Which data is required or relevant to obtain this knowledge?</p> <ul style="list-style-type: none"> <li>* Time</li> <li>* Location</li> <li>* Gender</li> <li>* Age</li> <li>* Exposure data (what did you eat, did you use drugs)</li> <li>* Species (mice, human, other animal)</li> <li>* Disease status (after treatment, before treatment)</li> <li>* Time series (longitudinal sequencing, how dynamic, how quickly does it change)</li> <li>* Which bacteria? + count (absolute)</li> <li>* Diet</li> <li>* Genome</li> <li>* Timestamps</li> <li>* Location of microbiome sample in the body/plant)</li> <li>* Baseline characteristics (e.g. age, gender)</li> <li>* Environmental information</li> <li>* Epidemiological information</li> <li>* Diet</li> <li>* Clinical trial data</li> <li>* Sequencing (amplicon, whole gen.)</li> <li>* Longitudinal information</li> <li>* Treatment and other clinical variables</li> <li>* Disease status/clinical outcome</li> <li>* Metabolic information</li> <li>* Hormonal changes</li> <li>* Microbiomes of contacts</li> <li>* Lifestyle</li> <li>* Health status</li> <li>* Gender</li> <li>* Time and age</li> <li>* Immune response over time</li> </ul> |
|----------------------------------------------------------------------------------------------------------------------------------------------------------------------------------------------------------------------------------------------------------------------------------------------------------------------------------------------------------------------------------------------------------------------------------------------------------------------------------------------------------------------------------------------------------------------------------------------------------------------------------------------------------------------------------------------------------------------------------------------------------------------------------------------------------------------------------------------------------------------------------------------------------------------------------------------------------------------------------------------------------------------------------------------------------------------------------------------------------------------------------------------------------------------------------------------------------------------------|

**Table S2.** Answers provided by the workshop participants to question 2.

|                                                                                                                                                                                                                                                                                                                                                                                                                                                                                                                                                                                                                                                                                                                                                                                                                                                                                                                                                                                                                                                                                                                                                                                                                                                    |
|----------------------------------------------------------------------------------------------------------------------------------------------------------------------------------------------------------------------------------------------------------------------------------------------------------------------------------------------------------------------------------------------------------------------------------------------------------------------------------------------------------------------------------------------------------------------------------------------------------------------------------------------------------------------------------------------------------------------------------------------------------------------------------------------------------------------------------------------------------------------------------------------------------------------------------------------------------------------------------------------------------------------------------------------------------------------------------------------------------------------------------------------------------------------------------------------------------------------------------------------------|
| <p>Q3: To answer questions of Q1: which specific aspects can be retrieved from the OTU/ASV abundance table?</p> <ul style="list-style-type: none"> <li>* Most present taxonomies in collected samples</li> <li>* Taxonomic abundance</li> <li>* Variability of abundances</li> <li>* p-values</li> <li>* Effect sizes (e.g. diff. in relative or absolute abundance between two conditions)</li> <li>* Co-abundance (association measures)</li> <li>* Diversity indices</li> <li>* Absolute/relative abundance (important difference)</li> <li>* Metabolites</li> <li>* Pro/anti-inflammatory profile</li> <li>* Integrated exploration of raw data (of all data listed before)</li> <li>* Variance between different environments/treatments (how different are they)</li> <li>* Variance after re-sampling/removing noisiness, duplicates</li> <li>* Effects of baseline characteristics</li> <li>* Alpha and Beta diversity</li> <li>* Correlation between taxa</li> <li>* Alpha diversity</li> <li>* Biomarker discovery</li> <li>* Relative abundance</li> <li>* Interaction network</li> <li>* Identify pathogens</li> <li>* Metabolite classification</li> <li>* Phylogenetic level</li> <li>* Fat content</li> <li>* Metabolism</li> </ul> |
|----------------------------------------------------------------------------------------------------------------------------------------------------------------------------------------------------------------------------------------------------------------------------------------------------------------------------------------------------------------------------------------------------------------------------------------------------------------------------------------------------------------------------------------------------------------------------------------------------------------------------------------------------------------------------------------------------------------------------------------------------------------------------------------------------------------------------------------------------------------------------------------------------------------------------------------------------------------------------------------------------------------------------------------------------------------------------------------------------------------------------------------------------------------------------------------------------------------------------------------------------|

**Table S3.** Answers provided by the workshop participants to question 3.

|                                                                                                                                                                                                                                                                                                                                                                                                                                                                                                                                                                                                                                                                                                                                                                                                                                                                                                                                                                   |
|-------------------------------------------------------------------------------------------------------------------------------------------------------------------------------------------------------------------------------------------------------------------------------------------------------------------------------------------------------------------------------------------------------------------------------------------------------------------------------------------------------------------------------------------------------------------------------------------------------------------------------------------------------------------------------------------------------------------------------------------------------------------------------------------------------------------------------------------------------------------------------------------------------------------------------------------------------------------|
| <p>Q4: Given the aspects you wrote down before, can you think about methods needed and or used (statistically, visually) to obtain this information.</p> <ul style="list-style-type: none"> <li>* PCoA (and related ordination methods)</li> <li>* Statistical modeling + differential abundance analysis (DESeq2, EdgeR, ANCOM2)</li> <li>* Venn diagrams (to display; most present taxonomies, compare taxonomic ranks between different samples)</li> <li>* Differential abundance methods (parametric/ non-parametric/ semi-parametric)</li> <li>* (stacked) Bar charts (used to display metabolites)</li> <li>* Dendrograms</li> <li>* Custom visual designs</li> <li>* Parallel coordinates (to display different types of information)</li> <li>* Sample clustering (tsne, UMAP, STAD) → scatterplot, node link</li> <li>* Heatmaps (OTU abundance vs timepoints)</li> <li>* Upset (replacement for venn diagram if more than three categories)</li> </ul> |
|-------------------------------------------------------------------------------------------------------------------------------------------------------------------------------------------------------------------------------------------------------------------------------------------------------------------------------------------------------------------------------------------------------------------------------------------------------------------------------------------------------------------------------------------------------------------------------------------------------------------------------------------------------------------------------------------------------------------------------------------------------------------------------------------------------------------------------------------------------------------------------------------------------------------------------------------------------------------|

**Table S4.** Answers provided by the workshop participants to question 4.

Q5: When you think about your own research, I'm interested in the platforms, tools, packages you have used, or are using currently to analyze the microbiome. Can you list these up?

- \* Phyloseq
- \* Microbiome
- \* DESeq2 (diff abundance)
- \* Limma (diff abundance)
- \* EdgeR (diff abundance)
- \* Piur (probabilistic index models)
- \* HMP (Human microbiome project) (data)
- \* phyloseq (R-package)
- \* MicrobiomeHD (datasets + methods)
- \* PICRUST
- \* ggplot2 (for plotting)
- \* D3
- \* HTML/CSS/JS Svelte
- \* Databases (SQL, graph, document store)
- \* Webserver
- \* Pen + paper

**Table S5.** Answers provided by the workshop participants to question 5.

## 1.2 Figures

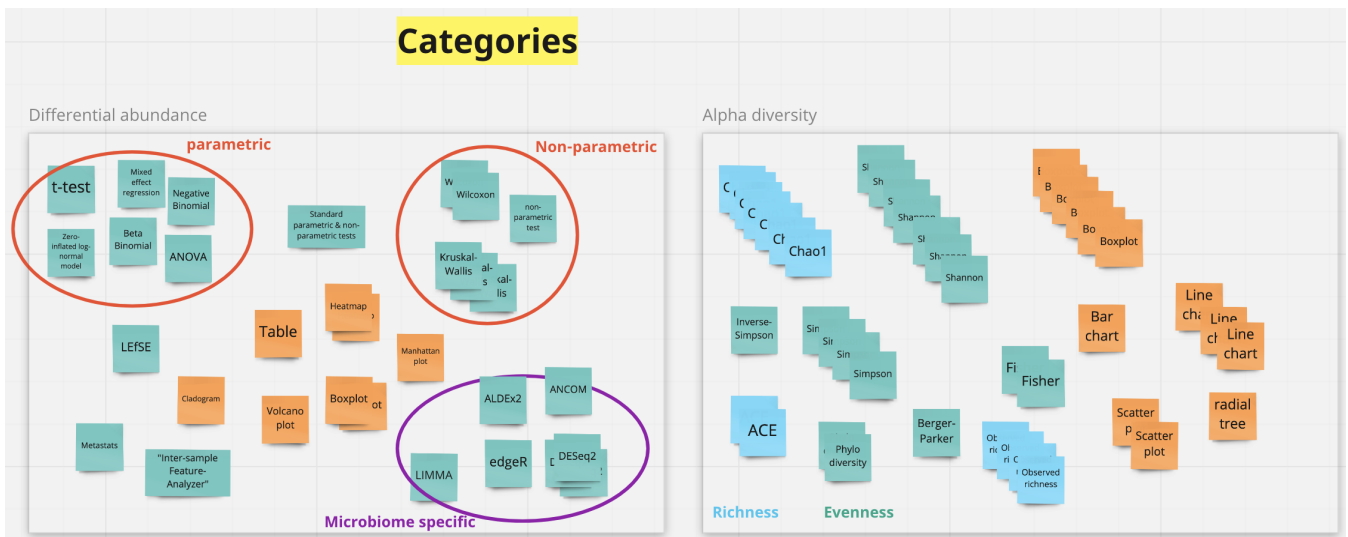

**Figure S1.** A reproduction of the initial card sort game, displaying how cards are sorted within 2 categories based on frequency of occurrence. The actual exercise were carried out using post its and markers.

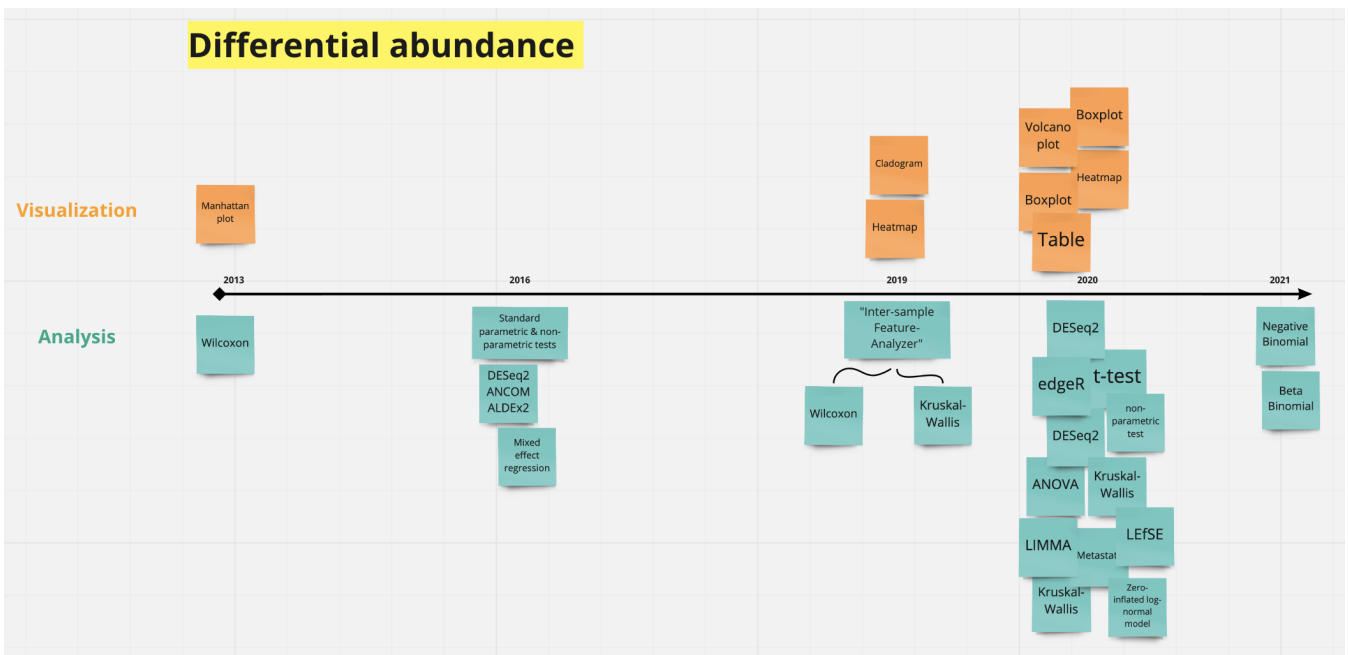

**Figure S2.** A reproduction of a history map exercise conducted to answer question 2 (i.e. How did the methods used to capture these microbiome aspects develop or change over time?) on differential abundance. The actual exercises were carried out using pen and paper.
